# Supplementary material for: Turnip Mosaic Potyvirus Probably First Spread to Eurasian Brassica Crops from Wild Orchids about 1000 Years Ago
Source: PLoS One. 2013 Feb 6;8(2):e55336. doi: 10.1371/journal.pone.0055336 (PMC3566190; doi:10.1371/journal.pone.0055336)
Supplement: Table S2 — Recombination sites in full genomic sequences. (DOC) [file pone.0055336.s005.doc]

**Table S2.** Recombination sites in full genomic sequences.

| Isolate | Recombinant type | Recombinant type pattern | Recombination site | Parental sequence (group) | RDP | GENECONV | BootScan | MaxChi | Chimaera | SiScan | PhylPro |
| --- | --- | --- | --- | --- | --- | --- | --- | --- | --- | --- | --- |
| P-value | | | | | P and Z-value |
| 1J | Inter- recombinant | ABR x wB3 x ABR x wB3 x wB2 | 183 | CH6(ABR) x FKH122J(wB3) | 1.15 x 10-6 | 2.90 x 10-6 | 7.23 x 10-7 | 4.33 x 10-6 | 1.11 x 10-4 | 1.56 x 10-6 |  |
| 750 | DNK4(wB3) x CHN1(ABR) | 2.63 x 10-22 | 1.98 x 10-20 | 1.63 x 10-22 | 1.55 x 10-8 | 2.18 x 10-8 | 1.54 x 10-11, Z>6.52 |  |
| 948 | YAD020J(ABR) x GBR7(wB3) | 2.38 x 10-27 | 8.89 x 10-27 | 2.32 x 10-37 | 1.93 x 10-17 | 5.30 x 10-18 | 1.80 x 10-20, Z>6.52 | Detected |
| 6293 | GBR36(wB3) x CDN1/Q-Ca(wB2) | 1.28 x 10-20 | 1.65 x 10-11 | 9.49 x 10-20 | 6.58 x 10-8 | 1.41 x 10-9 | 1.29 x 10-13, Z>4.2 |  |
| 2J | Intra-recombinant | wB2 x wB3 x wB3 x wB2 | 643 | PV134(wB3) x Ka1J(wB3) | 1.15 x 10-32 | 3.69 x 10-19 | 3.69 x 10-33 | 1.47 x 10-6 | 9.65 x 10-8 | 7.80 x 10-14, Z>3.98 |  |
| 2194 | MYD013J(wB3) x Tu2R1(wB3) | 6.03 x 10-14 | 4.91 x 10-13 | 3.58 x 10-14 | 6.03 x 10-12 | 2.96 x 10-7 | 2.21 x 10-15 |  |
| 6293 | GBR36(wB3) x CDN1/Q-Ca(wB2) | 1.63 x 10-13 | 1.39 x 10-3 | 9.49 x 10-20 | 9.56 x 10-4 | 8.78 x 10-6 | 8.37 x 10-9, Z>4.2 |  |
| 59J | Inter- recombinant | ABR x wB3 x ABR x wB3 | 200 | CH6(ABR) x USA4(wB3) | 1.50 x 10-46 | 6.76 x 10-22 | 1.30 x 10-46 | 5.72 x 10-14 | 3.63 x 10-14 | 2.67 x 10-14, Z>5,78 |  |
| 756 | USA4(wB3) x CH6(ABR) | 1.50 x 10-46 | 6.76 x 10-22 | 1.30 x 10-46 | 5.72 x 10-14 | 3.63 x 10-14 | 2.67 x 10-14, Z>6.57 |  |
| 9152 | CHL13(ABR) x HZ6(wB3) | 9.98 x10-17 | 5.69 x10-13 | 6.54 x10-18 | 1.40 x 10-3 | 3.71 x 10-1 | 1.36 x10-4, Z>3.44 |  |
| C42J | Intra-recombinant | wB3 x wB3 x wB2 | 739 | YAD020J(wB3) x GBR7(wB3) | 6.64 x 10-29 | 1.78 x 10-16 | 2.33 x 10-29 | 6.65 x 10-16 | 1.47 x 10-16 | 3.06 x 10-15 |  |
| 6300 | GBR36(wB3) x CDN1(wB2) | 3.68 x 10-22 | 5.71 x 10-14 | 1.54 x 10-22 | 7.84 x 10-8 | 8.28 x 10-9 | 5.03 x 10-13, Z>6.5 |  |
| DMJ | Intra-recombinant | wB2 x wB3 x wB3 x wB3 x wB2 | 695 | DNK2(wB2) x Ka1J(wB3) | 1.21 x 10-22 | 2.95 x 10-9 | 6.28 x 10-23 | 1.26 x 10-5 | 4.55 x 10-6 | 2.68 x 10-9 |  |
| 1227 | FKD004J(wB3) x HZ6(wB3) | 1.03 x 10-12 | 6.68 x 10-4 | 2.10 x 10-12 | 3.58 x 10-7 | 6.57 x 10-9 | 1.19 x 10-11, Z>4.35 |  |
| 2056 | HZ6(wB3) x FKD004J(wB3) | 1.03 x 10-12 | 6.68 x 10-4 | 2.10 x 10-12 | 3.58 x 10-7 | 6.57 x 10-9 | 1.19 x 10-11, Z>4.35 |  |
| 6293 | GBR36(wB3) x CDN1/Q-Ca(wB2) | 3.80 x 10-21 | 1.97 x 10-12 | 1.60 x 10-21 | 6.16 x 10-8 | 2.34 x 10-9 | 2.15 x 10-12, Z>4.2 |  |
| Ka1J | Intra-recombinant | wB3 x wB3 x wB2 | 748 | YAD020J(wB3) x GBR7(wB3) | 3.37 x 10-32 | 7.49 x 10-23 | 6.57 x 10-32 | 2.10 x 10-14 | 1.93 x 10-14 | 1.17 x 10-16 |  |
| 6293 | GBR36(wB3) x CDN1/Q-Ca(wB2) | 1.29 x 10-16 | 6.66 x 10-5 | 1.17 x 10-16 | 9.20 x 10-7 | 7.76 x 10-8 | 1.30 x 10-10, Z>4.2 |  |
| NDJ | Inter-recombinant | ABR x wB3 x ABR x wB3 | 225 | CH6(ABR) x USA4(wB3) | 2.76 x 10-45 | 6.70 x 10-32 | 2.48 x 10-45 | 1.55 x 10-10 | 4.70 x 10-12 | 9.55 x 10-14 |  |
| 728 | USA4(wB3) x CH6(ABR) | 2.76 x 10-45 | 6.70 x 10-32 | 2.48 x 10-45 | 1.55 x 10-10 | 4.70 x 10-12 | 9.55 x 10-14 |  |
| 6450 | MYD015J(ABR) x 2J(wB3) | 2.18 x10-144 | 3.70 x10-137 | 5.20 x10-144 | 2.68 x10-39 | 2.63 x 10-28 | 4.96 x 10-47 |  |
| FD27J | Inter-recombinant | ABR x wB3 x ABR x wB3 x ABR | 183 | CH6(ABR) x FKH122J(wB3) | 1.10 x 10-8 | 3.37 x 10-8 | 7.54 x 10-9 | 8.05 x 10-3 | 2.36 x 10-3 | 1.40 x 10-7, Z>6.07 |  |
| 750 | DNK4(wB3) x CHN1(ABR) | 7.46 x 10-15 | 3.71 x 10-16 | 5.12 x 10-15 | 8.69 x 10-6 | 8.78 x 10-6 | 1.67 x 10-11, Z>6.07 |  |
| 931 | HRD(ABR) x FKD004J(wB3) | 1.43 x 10-73 | 1.08 x 10-64 | 1.30 x 10-70 | 2.68 x 10-35 | 2.16 x 10-26 | 1.85 x 10-33, Z>6.07 | Detected |
| 2989 | FKD004J(wB3) x HRD(ABR) | 1.43 x 10-73 | 1.08 x 10-64 | 1.30 x 10-70 | 2.68 x 10-35 | 2.16 x 10-26 | 1.85 x 10-33, Z>6.07 | Detected |
| KD32J | Inter-recombinant | ABR x wB3 x ABR x wB3 | 224 | CH6(ABR) x USA4(wB3) | 2.21 x 10-41 | 2.45 x 10-22 | 3.08 x 10-42 | 2.92 x 10-11 | 6.01 x 10-12 | 3.97 x 10-13 |  |
| 728 | USA4(wB3) x CH6(ABR) | 2.21 x 10-41 | 2.45 x 10-22 | 3.08 x 10-42 | 2.92 x 10-11 | 6.01 x 10-12 | 3.97 x 10-13 |  |
| 9175 | CHL13(ABR) x HZ6(wB3) | 1.74 x 10-15 | 5.48 x 10-12 | 1.27 x 10-16 | 5.01 x 10-3 | 3.71 x 10-1 | 3.82 x 10-4, Z>3.25 |  |
| KYD81J | Intra-recombinant | bBR x bBR | 867 | TANX2(bBR) x USA6(bBR) | 8.04 x 10-10 | 2.81 x 10-3 | 2.70 x 10-9 | 5.01 x 10-8 | 3.84 x 10-7 | 1.33 x 10-10 |  |
| TD88J | Inter-recombinant | bBR x ABR x bBR x bBR | 2449 | DEU4(bBR) x ND10J(ABR) | 5.16 x10-76 | 3.43 x10-66 | 3.35 x10-73 | 1.41 x10-17 | 8.70 x10-20 | 3.64 x10-22 | Detected |
| 3016 | ND10J(ABR) x DEU4(bBR) | 5.16 x10-76 | 3.43 x10-66 | 3.35 x10-73 | 1.41 x10-17 | 8.70 x10-20 | 3.64 x10-22 |  |
| 6541 | TANX2(bBR) x NID119J(bBR) | 1.13 x10-29 | 2.69 x10-17 | 7.31 x10-29 | 1.66 x10-13 | 6.36 x10-11 | 3.68 x10-18 |  |
| CP845J | Intra-recombinant | bBR x bBR x bBR | 867 | TANX2(bBR) x USA6(bBR) | 1.60 x 10-12 | 4.08 x 10-5 | 1.12 x 10-12 | 6.91 x 10-10 | 2.82 x 10-9 | 1.23 x 10-13 |  |
| 1713 | ITA7(bBR) x KWB779J/PV0104(bBR) | 1.26 x 10-9 | 1.11 x 10-1 | 5.15 x 10-10 | 1.13 x 10-8 | 5.12 x 10-10 | 4.39 x 10-20, Z<3.0 |  |
| HOD517J | Inter-recombinant | wB3 x ABR x wB3 x ABR x wB3 | 756 | USA4(wB3) x CH6(ABR) | 1.14 x10-47 | 3.16 x10-13 | 2.52 x10-47 | 3.43 x10-17 | 6.81 x10-17 | 3.84 x10-15 |  |
| 5284 | SMD060J(ABR) x FKD001J(wB3) | 2.04 x10-31 | 2.63 x10-22 | 2.03 x10-30 | 1.89 x10-7 | 1.80 x10-7 | 5.35 x10-9 |  |
| 5732 | FKD001J(wB3) x SMD060J(ABR) | 2.04 x10-31 | 2.63 x10-22 | 2.03 x10-30 | 1.89 x10-7 | 1.80 x10-7 | 5.35 x10-9 | Detected |
| 6097 | MYD015J(ABR) x 2J(wB3) | 1.00 x10-103 | 2.17 x10-51 | 6.87 x10-100 | 1.70 x10-37 | 7.89 x10-4 | 1.21 x10-44 | Detected |
| SGD311J | Inter-recombinant | ABR x wB3 x ABR x wB3 x ABR | 190 | CH6(ABR) x USA4(wB3) | 7.19 x10-36 | 1.11 x10-15 | 1.25 x10-35 | 3.93 x10-11 | 1.41 x10-11 | 7.89 x10-13 |  |
| 745 | USA4(wB3) x CH6(ABR) | 7.19 x10-36 | 1.11 x10-15 | 1.25 x10-35 | 3.93 x10-11 | 1.41 x10-11 | 7.89 x10-13 |  |
| 5013 | SMD060J(ABR) x FKD001J(wB3) | 6.83 x10-43 | 9.92 x10-30 | 1.53 x10-41 | 8.59 x10-11 | 2.88 x10-12 | 5.14 x10-15 | Detected |
| 5726 | FKD001J(wB3) x SMD060J(ABR) | 6.83 x10-43 | 9.92 x10-30 | 1.53 x10-41 | 8.59 x10-11 | 2.88 x10-12 | 5.14 x10-15, Z>6.58 | Detected |
| Al | Non-recombinant | basal-B1 (bB1) |  |  |  |  |  |  |  |  |  |
| A64 | Inter-recombinant | bB1 x wB3 | 9285 | Al(bB1) x CZE1(wB3) | 8.54 x10-10 | 8.58 x10-4 | 4.74 x10-11 | 4.71 x10-1 | ND | 2.56 x10-8, Z>3.88 |  |
| A102/11 | Inter-recombinant | wB3/bBR x bB1 x bB1 x wB1 | 605 | Rn98(wB3/bBR?) x GRC42(bB1) | 1.23 x10-7 | 9.62 x10-13 | 1.98 x10-8 | 2.22 x10-3 | 1.42 x10-1 | 1.38 x10-15 |  |
| 2020 | ITA1A(bB1) x Eru1D(bB1) | 3.49 x10-54 | 1.10 x10-83 | 1.24 x10-50 | 6.34 x10-38 | 1.34 x10-22 | 2.88 x10-45 |  |
| 9183 | Al(bB1) x CZE1(wB1) | 2.97 x10-10 | 2.56 x10-3 | 1.28 x10-10 | 4.89 x10-4 | ND | 7.60 x10-6 |  |
| QCa | Non-recombinant | world-B2 (wB2) |  |  |  |  |  |  |  |  |  |
| CDN1 | Intra-recombinant | wB2 x wB3 x wB2 | 5200 | QCa(wB2) x YC5 (wB3) |  |  |  |  |  | Z>8.57 |  |
| 5300 | YC5 (wB3) x QCa (wB2) |  |  |  |  |  | Z>5.93 | Detected |
| CHN12 | Intra-recombinant | wB3 x wB3 x wB2 | 748 | YAD020J(wB3) x GBR7(wB3) | 4.06 x10-33 | 4.91 x10-14 | 2.51 x10-33 | 4.44 x10-13 | 8.53 x10-15 | 7.74 x10-16 |  |
| 6293 | GBR36(wB3) x CDN1/Q-Ca(wB2) | 5.40 x 10-24 | 6.79 x 10-18 | 6.10 x 10-25 | 3.68 x 10-8 | 5.55 x 10-9 | 1.41 x 10-13, Z>4.2 |  |
| NZ290 | Intra-recombinant | wB2 x wB2 | 7992 | DNK3(wB2) x CDN1(wB2) | 1.23 x10-15 | 3.79 x10-7 | 9.91 x10-16 | 5.93 x10-7 | 1.43 x10-7 | 3.53 x10-12 |  |
| UK1 | Intra-recombinant | wB3 x wB3 x wB2 | 738 | YAD020J(wB3) x GBR7(wB3) | 2.28 x10-35 | 1.46 x10-21 | 5.57 x10-36 | 5.32 x10-15 | 2.19 x10-15 | 6.67 x10-16 |  |
| 6293 | GBR36(wB3) x CDN1/Q-Ca(wB2) | 1.31 x 10-21 | 4.64 x 10-12 | 7.06 x 10-22 | 1.94 x 10-8 | 6.92 x 10-9 | 2.58 x 10-13, Z>4.2 |  |
| CHN1 | Inter-recombinant | ABR x wB3 | 8768 | MYD015J(ABR) x 2J(wB3) | 4.27 x10-47 | 1.14 x10-76 | 6.50 x10-45 | 1.04 x10-34 | 2.55 x10-27 | 1.97 x10-84 | Detected |
| HRD | Non-recombinant | Asian-BR (ABR) |  |  |  |  |  |  |  |  |  |
| KEN 1 | Intra-recombinant | wB3 x wB2 | 6293 | GBR36(wB3) x CDN1/Q-Ca(wB2) | 2.98 x 10-16 | 7.56 x 10-9 | 1.74 x 10-16 | 5.27 x 10-7 | 3.09 x 10-7 | 2.46 x 10-10, Z>4.2 |  |
| PV376Br | Intra-recombinant | wB3 x wB2 x wB2 | 7968 | DNK3(wB2) x GBR7(wB2) | 1.47 x10-18 | 2.04 x10-1 | 4.08 x10-18 | 4.50 x10-8 | ND | 2.30 x10-9, Z>4.95 |  |
| 8004 | DNK3(wB2) x CDN1(wB2) | 4.55 x10-13 | 5.93 x10-2 | 1.11 x10-13 | 1.30 x10-8 | 3.93 x10-10 | 3.06 x10-10, Z>4.91 |  |
| BZ1 | Non-recombinant | world-B2 (wB2) |  |  |  |  |  |  |  |  |  |
| Cal1 | Non-recombinant | basal-BR (bBR) |  |  |  |  |  |  |  |  |  |
| IS1 | Non-recombinant | basal-B2 (bB2) |  |  |  |  |  |  |  |  |  |
| PV0104 | Intra-recombinant | bBR x bBR x bBR | 922 | ITA7(bBR) x TANX2(bBR) | 7.98 x10-29 | 2.29 x10-25 | 8.19 x10-30 | 4.63 x10-26 | 2.70 x10-19 | 1.40 x10-44 |  |
| 5965 | KWB779J(bBR) x ITA7(bBR) | 6.74 x10-17 | 2.95 x10-15 | 2.93 x10-16 | 1.56 x10-22 | 4.26 x10-19 | 1.02 x10-5 |  |
| St48 | Inter-recombinant | wB3 x bB1 | 1543 | FRD1(wB3) x A64(bB1) | 7.13 x 10-6 | 1.03 x 10-5 | 3.54 x 10-6 | 8.73 x 10-6 | 3.12 x 10-7 | 1.36 x10-18, Z>6.04 |  |
| Rn98 | Inter-recombinant | wB3 x bB1 | 1543 | TANX2(bBR) x TIGD(bB1) | 2.31 x10-16 | ND | 1.88 x10-13 | 3.40 x10-3 | 6.20 x10-6 | 8.25 x10-11 |  |
| 1600 (tentative) | FRD1 x A64 | 4.77 x 10-5 | 4.30 x 10-2 | 4.56 x 10-5 | 1.18 x 10-1 | 1.31 x 10-1 | 1.98 x10-16, Z>3.8 |  |
| ITA 7 | Non-recombinant | basal-BR (bBR) |  |  |  |  |  |  |  |  |  |
| CZE 1 | Intra-recombinant | wB3 x wB2 x wB3 | 6009, | DNK2(wB3) x DNK3(wB2) | 7.67 x10-76 | 1.77 x10-71 | 1.62 x10-73 | 2.08 x10-34 | 3.35 x10-20 | 7.78 x10-42 |  |
| 8767 | DNK3(wB2) x DNK2(wB3) | 3.72 x10-76 | 8.50 x10-72 | 7.88 x10-74 | 1.01 x10-34 | 1.62 x10-20 | 2.82 x10-42 |  |
| RUS 1 | Non-recombinant | world-B1 (wB1) |  |  |  |  |  |  |  |  |  |
| RUS 2 | Intra-recombinant | wB3 x wB2 x wB3 | 6009 | DNK2(wB3) x DNK3(wB2) | 1.88 x10-79 | 3.19 x10-74 | 4.96 x10-77 | 1.47 x10-34 | 3.35 x10-20 | 3.02 x10-42 |  |
| 8791 | DNK3(wB2) x DNK2(wB3) | 9.11 x10-80 | 1.60 x10-74 | 2.40 x10-77 | 7.12 x10-35 | 1.62 x10-20 | 1.57 x10-42 |  |
| C1 | Intra-recombinant | wB3 x wB2 x wB3 x wB2 x wB2 | 4016 | USA1(wB3) x QCa(wB2) | 3.51 x10-41 | 3.07 x10-35 | 3.18 x10-41 | 4.80 x10-10 | 7.63 x10-10 | 5.69 x10-11 | Detected |
| 4445 | QCa(wB2) x USA1(wB3) | 1.70 x10-41 | 1.49 x10-35 | 1.54 x10-41 | 2.33 x10-10 | 9.58 x10-10 | 1.86 x10-12 | Detected |
| 5551 | QCa(wB2) x USA1(wB3) | 5.44 x10-20 | 9.56 x10-18 | 5.36 x10-20 | 8.40 x10-3 | 9.43 x10-2 | 6.81 x10-4 |  |
| 6293 | GBR36(wB3) x CDN1/Q-Ca(wB2) | 4.71 x 10-11 | 1.44 x 10-2 | 1.63 x 10-11 | 6.29 x 10-7 | 2.64 x 10-7 | 3.98 x 10-13, Z>4.2 |  |
| TW | Intra-recombinant | wB3 x wB3 x wB2 | 686 | YAD020J(wB3) x GBR7(wB3) | 4.64 x10-28 | 9.31 x10-14 | 5.32 x10-28 | 1.22 x10-13 | 9.20 x10-15 | 3.04 x10-15 |  |
| 6293 | GBR36(wB3) x CDN1/Q-Ca(wB2) | 2.95 x 10-20 | 5.26 x 10-9 | 1.13 x 10-20 | 6.54 x 10-7 | 3.21 x 10-8 | 4.85 x 10-13, Z>4.2 |  |
| Tu3 | Intra-recombinant | wB3 x wB3 x wB2 | 738 | YAD020J(wB3) x GBR7(wB3) | 2.78 x10-27 | 5.11 x10-18 | 1.81 x10-27 | 5.30 x10-13 | 2.59 x10-14 | 2.47 x10-13 |  |
| 6293 | GBR36(wB3) x CDN1/Q-Ca(wB2) | 3.07 x 10-23 | 1.43 x 10-12 | 1.38 x 10-23 | 1.10 x 10-9 | 1.22 x 10-9 | 5.35 x 10-13, Z>4.2 |  |
| Tu2-R1 | Intra-recombinant | wB3 x wB3 x wB2 | 748 | YAD020J(wB3) x GBR7(wB3) | 3.40 x10-29 | 1.36 x10-19 | 4.44 x10-29 | 2.01 x10-14 | 1.32 x10-14 | 7.07 x10-16 |  |
| 6293 | GBR36(wB3) x CDN1/Q-Ca(wB2) | 4.50 x 10-14 | 4.02 x 10-3 | 4.74 x 10-14 | 9.04 x 10-6 | 1.53 x 10-7 | 4.25 x 10-9, Z>4.2 |  |
| RC4 | Intra-recombinant | wB3 x wB3 x wB2 x wB2/wB3 | 747 | YAD020J(wB3) x GBR7(wB3) | 7.02 x10-26 | 1.21 x10-10 | 3.73 x10-26 | 4.41 x10-13 | 4.02 x10-15 | 2.56 x10-14 |  |
| 6293 | GBR36(wB3) x CDN1/Q-Ca(wB2) | 1.24 x 10-19 | 1.30 x 10-9 | 4.49 x 10-20 | 4.30 x 10-8 | 5.37 x 10-10 | 6.80 x 10-13, Z>4.2 |  |
| 7406-7414 | DNK2(wB3) x NLD1(wB2/wB3) | 7.12 x 10-8 | 1.43 x 10-3 | 7.88 x 10-8 | 5.05 x 10-6 | 4.05 x 10-6 | 2.42 x 10-10, Z<3.0 |  |
| YC5 | Intra-recombinant | wB3 x wB3 x wB2 | 747 | YAD020J(wB3) x GBR7(wB3) | 5.63 x10-29 | 1.43 x10-16 | 1.02 x10-29 | 3.85 x10-15 | 2.22 x10-16 | 2.42 x10-14 |  |
| 6293 | GBR36(wB3) x CDN1/Q-Ca(wB2) | 1.92 x 10-22 | 1.93 x 10-11 | 7.15 x 10-23 | 1.55 x 10-9 | 8.36 x 10-10 | 5.90 x 10-15, Z>4.2 |  |
| GBR 36 | Intra-recombinant | wB3 x wB3 | 746 | YAD020J(wB3) x GBR7(wB3) | 1.22 x10-36 | 4.11 x10-19 | 2.38 x10-36 | 3.34 x10-15 | 3.60 x10-15 | 2.47 x10-15 |  |
| GBR 50 | Intra-recombinant | wB3 x wB3 x wB2 | 760 | YAD020J(wB3) x GBR7(wB3) | 1.17 x10-39 | 7.30 x10-26 | 4.45 x10-40 | 1.61 x10-15 | 1.77 x10-16 | 1.06 x10-16 |  |
| 6293 | GBR36(wB3) x CDN1/Q-Ca(wB2) | 4.86 x 10-16 | 1.06 x 10-4 | 2.75 x 10-16 | 2.85 x 10-8 | 4.04 x 10-8 | 9.97 x 10-12, Z>4.2 |  |
| GRC 17 | Intra-recombinant | wB3 x wB3 x wB2 | 738 | YAD020J(wB3) x GBR7(wB3) | 3.59 x10-30 | 9.43 x10-20 | 1.20 x10-30 | 8.27 x10-15 | 9.47 x10-15 | 2.32 x10-14 |  |
| 6293 | GBR36(wB3) x CDN1/Q-Ca(wB2) | 1.23 x 10-22 | 6.96 x 10-10 | 6.81 x 10-23 | 2.35 x 10-10 | 6.02 x 10-11 | 9.84 x 10-14, Z>4.2 |  |
| GRC42 | Non-recombinant | basal-B1 (bB1) |  |  |  |  |  |  |  |  |  |
| ITA 3 | Inter-recombinant | bBR x bB2 | 644 | ITA8(bBR) x IS1(bB2) | 3.45 x10-24 | 1.10 x10-16 | 1.66 x10-23 | 2.67 x10-6 | 3.08 x10-6 | 3.61 x10-17 |  |
| DNK 2 | Intra-recombinant | wB2 x wB1 | 2453 | DNK3(wB2) x CAR37A(wB1) | 3.41 x10-124 | 7.55 x10-117 | 2.07 x10-121 | 1.28 x10-39 | 3.38 x10-26 | 3.71 x10-42 |  |
| CZE 5 | Non-recombinant | world-B2 |  |  |  |  |  |  |  |  |  |
| FRD 1 | Intra-recombinant | wB2 x wB2/wB3 x wB2 | 711 | NLD1(wB2) x DNK3(wB2) | 5.52 x 10-16 | 1.14 x 10-4 | 2.35 x 10-16 | 4.76 x 10-5 | 5.02 x 10-7 | 8.27 x 10-7, Z>4.02 |  |
| 6550 | GBR36(wB3) x CDN1(wB2) | 7.33 x 10-10 | 5.68 x 10-7 | 1.49 x 10-9 | 1.04 x 10-4 | 4.03 x 10-5 | 6.87 x 10-12, Z>5.17 |  |
| 7406-7414(tentative) | DNK2 x NLD1 | ND | ND | ND | ND | ND | Z>4.2 |  |
| NLD 1 | Intra-recombinant | wB2 x wB2 | 6293 | GBR36(wB3) x CDN1/Q-Ca(wB2) | 4.69 x 10-17 | 6.40 x 10-8 | 1.66 x 10-17 | 4.54 x 10-9 | 7.42 x 10-10 | 3.23 x 10-14, Z>4.2 |  |
| H1J | Inter-recombinant | wB3 x ABR x wB3 x wB2 x ABR x wB3 | 758 | USA4(wB3) x CH6(ABR) | 2.17 x 10-47 | 4.21 x 10-27 | 1.83 x 10-46 | 4.41 x 10-17 | 6.26 x 10-17 | 3.22 x 10-16 |  |
| 5207 | MYD015J(ABR) x 2J(wB3) | 2.78 x 10-114 | 1.80 x 10-108 | 5.77 x 10-112 | 6.56 x 10-45 | 2.26 x 10-26 | 1.80 x 10-49 |  |
| 6293 | GBR36(wB3) x CDN1/Q-Ca(wB2) | 1.23 x 10-22 | 6.96 x 10-10 | 6.81 x 10-23 | 2.35 x 10-10 | 6.02 x 10-11 | 9.84 x 10-14, Z>4.2 |  |
| 8788 | YAL018J(wB3) x TRD052J(ABR) | 1.34 x 10-27 | 1.31 x 10-24 | 5.66 x 10-28 | 5.93 x 10-11 | 9.34 x 10-12 | 3.96 x 10-14 | Detected |
| 9304 | TRD052J(ABR) x YAL018J(wB3) | 1.34 x 10-27 | 1.31 x 10-24 | 5.66 x 10-28 | 5.93 x 10-11 | 9.34 x 10-12 | 3.96 x 10-14 |  |
| AD178J | Inter-recombinant | wB3 x ABR x wB2 | 748 | GBR7(wB3) x YAD020J(ABR) | 6.43 x10-30 | 2.68 x10-21 | 1.35 x10-29 | 4.55 x10-14 | 1.07 x10-14 | 2.33 x10-16 |  |
| 6293 | GBR36(wB3) x CDN1/Q-Ca(wB2) | 1.17 x 10-16 | ND | 5.00 x 10-17 | 3.26 x 10-8 | 1.14 x 10-8 | 4.24 x 10-11, Z>4.2 |  |
| AD181J | Inter-recombinant | wB3 x ABR x wB3 x wB2 x ABR x wB3 | 756 | USA4(wB3) x CH6(ABR) | 4.01 x10-55 | 1.25 x10-32 | 3.22 x10-49 | 2.70 x10-17 | 3.80 x10-17 | 3.22 x10-17 |  |
| 5207 | MYD015J(ABR) x 2J(wB3) | 1.17 x10-106 | 3.03 x10-101 | 8.54 x10-105 | 1.83 x10-44 | 1.40 x10-25 | 3.51 x10-47 |  |
| 6293 | GBR36(wB3) x CDN1/Q-Ca(wB2) | 1.23 x 10-22 | 6.96 x 10-10 | 6.81 x 10-23 | 2.35 x 10-10 | 6.02 x 10-11 | 9.84 x 10-14, Z>4.2 |  |
| 8788 | YAL018J(wB3) x TRD052J(ABR) | 6.37 x10-35 | 1.76 x10-32 | 3.05 x10-35 | 3.01 x10-12 | 1.82 x10-12 | 3.21 x10-15 | Detected |
| 9304 | TRD052J(ABR) x YAL018J(wB3) | 6.37 x10-35 | 1.76 x10-32 | 3.05 x10-35 | 3.01 x10-12 | 1.82 x10-12 | 3.21 x10-15 |  |
| AD853J | Inter-recombinant | wB3 x ABR x wB2 | 739 | GBR7(wB3) x YAD020J(ABR) | 7.61 x10-34 | 1.24 x10-22 | 7.70 x10-34 | 1.55 x10-13 | 6.55 x10-15 | 9.76 x10-16, Z>6.41 |  |
| 6293 | GBR36(wB3) x CDN1/Q-Ca(wB2) | 4.85 x 10-25 | 4.44 x 10-14 | 1.99 x 10-25 | 6.57 x 10-10 | 9.73 x 10-11 | 2.83 x10-15, Z>5.99 |  |
| AD855J | Inter-recombinant | ABR x wB3 x ABR | 224 | CH6(ABR) x USA4(wB3) | 2.04 x10-48 | 3.63 x10-29 | 3.20 x10-48 | 6.82 x10-13 | 3.56 x10-13 | 5.99 x10-14 |  |
| 729 | HZ6(wB3) x HRD(ABR) | 1.57 x10-64 | 9.24 x10-54 | 1.45 x10-63 | 5.75 x10-14 | 6.60 x10-15 | 9.55 x10-18 |  |
| AD860J | Inter-recombinant | wB3 x ABR x wB3 x wB2 | 756 | USA4(wB3) x CH6(ABR) | 3.40 x10-42 | 4.38 x10-9 | 1.18 x10-41 | 1.59 x10-16 | 9.01 x10-17 | 1.82 x10-14 |  |
| 5122 | MYD015J(ABR) x 2J(wB3) | 4.50 x10-100 | 7.79 x10-121 | 6.95 x10-99 | 5.54 x10-45 | 1.04 x10-24 | 1.58 x10-50 | Detected |
| 6293 | GBR36(wB3) x CDN1/Q-Ca(wB2) | 1.23 x 10-22 | 6.96 x 10-10 | 6.81 x 10-23 | 2.35 x 10-10 | 6.02 x 10-11 | 9.84 x 10-14, Z>4.2 |  |
| AT181J | Inter-recombinant | wB3 x ABR x wB3 x wB2 | 756 | USA4(wB3) x CH6(ABR) | 1.52 x10-14 | 2.59 x10-11 | 9.96 x10-14 | 1.56 x10-16 | 9.01 x10-8 | 6.25 x10-16 |  |
| 1559 | YAD020J(ABR) x GBR7(wB3) | 3.58 x10-100 | 4.73 x10-96 | 8.21 x10-104 | 2.51 x10-34 | 1.17 x10-23 | 1.01 x10-46 | Detected |
| 6293 | GBR36(wB3) x CDN1/Q-Ca(wB2) | 8.70 x 10-24 | 2.77 x 10-15 | 1.76 x 10-24 | 1.50 x 10-9 | 8.01 x 10-10 | 1.44 x 10-15, Z>4.2 |  |
| AKD161J | Inter-recombinant | wB3 x ABR x wB3 | 756 | USA4(wB3) x CH6(ABR) | 3.36 x10-41 | 3.63 x10-12 | 2.58 x10-40 | 1.82 x10-16 | 4.92 x10-17 | 9.84 x10-14 |  |
| 5122 | MYD015J(ABR) x 2J(wB3) | 3.15 x10-100 | 6.03 x10-117 | 1.96 x10-99 | 1.16 x10-44 | 5.60 x10-24 | 3.09 x10-51 | Detected |
| AKD934J | Inter-recombinant | wB3 x ABR | 902 | FKD004J(wB3) x HRD(ABR) | 1.20 x10-75 | 3.38 x10-45 | 6.04 x10-74 | 7.81 x10-22 | 1.43 x10-20 | 2.05 x10-20 | Detected |
| AKH937J | Inter-recombinant | wB3 x ABR x wB3 x wB2 xwB2/wB3 | 756 | USA4(wB3) x CH6(ABR) | 3.68 x10-43 | 3.27 x10-12 | 1.74 x10-42 | 2.49 x10-16 | 7.01 x10-17 | 6.88 x10-15 |  |
| 5122 | MYD015J(ABR) x 2J(wB3) | 7.88 x10-99 | 3.62 x10-115 | 1.20 x10-97 | 2.88 x10-44 | 3.87 x10-24 | 3.69 x10-50 | Detected |
| 6293 | GBR36(wB3) x CDN1/Q-Ca(wB2) | 1.23 x 10-22 | 6.96 x 10-10 | 6.81 x 10-23 | 2.35 x 10-10 | 6.02 x 10-11 | 9.84 x 10-14, Z>4.2 |  |
| 7406-7414 | DNK2(wB2) x NLD1(wB2/wB3) | 6.04 x 10-18 | 1.11 x 10-16 | 3.94 x 10-6 | 1.82 x 10-5 | 2.12 x 10-6 | 3.33 x 10-5, Z<3.0 |  |
| IWD032J | Inter-recombinant | wB3 x ABR x wB3 | 716 | USA4(wB3) x CH6(ABR) | 1.86 x10-49 | 4.03 x10-13 | 3.95 x10-48 | 6.47 x10-16 | 5.30 x10-15 | 1.13 x10-13 |  |
| 5991 | MYD015J(ABR) x 2J(wB3) | 4.24 x10-104 | 1.08 x10-109 | 2.84 x10-100 | 2.93 x10-42 | 4.50 x10-23 | 8.14 x10-43 | Detected |
| IWD038J(T63) | Intra-recombinant | wB3 x wB3 x wB2 | 748 | YAD020J(wB3) x GBR7(wB3) | 6.49 x10-31 | 2.96 x10-23 | 1.59 x10-30 | 4.49 x10-14 | 3.92 x10-15 | 8.91 x10-16 |  |
| 6293 | GBR36(wB3) x CDN1/Q-Ca(wB2) | 9.93 x 10-17 | 3.56 x 10-6 | 5.04 x 10-17 | 1.90 x 10-6 | 6.10 x 10-8 | 6.49 x 10-11, Z>4.2 |  |
| FKD001J | Intra-recombinant | wB2/wB3 x wB3 x wB3 x wB3 x wB2 | 695 | DNK3(wB2) x Ka1J (wb3) | 3.68 x 10-24 | 8.58 x 10-16 | 1.78 x 10-24 | 2.55 x 10-6 | 1.96 x 10-6 | 9.88 x 10-10 |  |
| 1194 | FKD004J(wB3) x HZ6(wB3) | 5.00 x 10-12 | 1.51 x 10-2 | 8.95 x 10-12 | 3.14 x 10-6 | 1.83 x 10-7 | 1.00 x 10-11 |  |
| 2056 | HZ6(wB3) x FKD004J(wB3) | 1.73 x 10-12 | 2.12 x 10-2 | 3.02 x 10-12 | 8.82 x 10-6 | 6.83 x 10-7 | 3.54 x 10-7 |  |
| 6293 | GBR36(wB3) x CDN1/Q-Ca(wB2) | 2.27 x 10-17 | 1.53 x 10-9 | 9.36 x 10-18 | 4.37 x 10-8 | 4.74 x 10-9 | 1.82 x 10-12, Z>4.2 |  |
| FKD004J | Intra-recombinant | wB2 x wB3 x wB2 | 643 | DNK3(wB2) x Ka1J(wB3) | 8.89 x10-24 | 3.07 x10-11 | 4.98 x10-25 | 1.63 x10-6 | 4.15 x10-7 | 9.34 x10-11 |  |
| 6293 | GBR36(wB3) x CDN1/Q-Ca(wB2) | 3.23 x 10-15 | 3.02 x 10-7 | 1.20 x 10-15 | 9.15 x 10-6 | 4.13 x 10-8 | 6.81 x 10-12, Z>4.2 |  |
| FKH122J | Intra-recombinant | wB2 x wB3 x wB2 | 695 | DNK3(wB2) x Ka1J(wB3) | 3.87 x10-37 | 4.37 x10-26 | 2.30 x10-37 | 1.38 x10-7 | 1.54 x10-8 | 3.66 x10-10 |  |
| 6293 | GBR36(wB3) x CDN1/Q-Ca(wB2) | 2.89 x 10-15 | 1.08 x 10-2 | 2.57 x 10-15 | 7.34 x 10-8 | 6.84 x 10-9 | 1.96 x 10-11, Z>4.2 |  |
| MYD013J | Intra-recombinant | wB2 x wB3 x wB3 x wB2 | 643 | DNK3(wB2) x Ka1J (wb3) | 3.68 x 10-24 | 8.58 x 10-16 | 1.78 x 10-24 | 2.55 x 10-6 | 1.96 x 10-6 | 9.88 x 10-10 |  |
| 1194 | FKD004J(wB3) x HZ6(wB3) | 1.51 x 10-15 | 2.79 x 10-5 | 9.12 x 10-16 | 2.11 x 10-8 | 3.04 x 10-9 | 4.40 x 10-14, Z>4.35 |  |
| 2056 | HZ6(wB3) x FKD004J(wB3) | 2.89 x 10-16 | 6.66 x 10-5 | 1.73 x 10-15 | 5.81 x 10-8 | 6.67 x 10-7 | 1.02 x 10-10, Z>4.35 |  |
| MYD015J | Inter-recombinant | wB2 x wB3 x ABR | 701 | DNK2(wB2) x YAL018J(wB3) | 2.12 x10-11 | 2.83 x10-8 | 3.98 x10-11 | 1.69 x10-8 | 3.89 x10-1 | 6.60 x10-12, Z>5.89 |  |
| 1621 | FKD004J(wB3) x HRD(ABR) | 1.18 x10-132 | 1.16 x10-122 | 2.80 x10-131 | 2.87 x10-34 | 2.13 x10-31 | 2.40 x10-41 | Detected |
| YAL018J | Intra-recombinant | wB3 x wB3 x wB2 x wB2/wB3 | 748 | YAD020J(wB3) x GBR7(wB3) | 2.15 x10-34 | 1.69 x10-23 | 1.24 x10-34 | 2.29 x10-15 | 1.34 x10-16 | 2.19 x10-17 |  |
| 6293 | GBR36(wB3) x CDN1/Q-Ca(wB2) | 1.19 x 10-20 | 1.49 x 10-8 | 4.41 x 10-21 | 3.86 x 10-8 | 6.31 x 10-6 | 7.34 x 10-14, Z>4.2 |  |
| 7406-7414 | DNK2(wB2) x NLD1(wB2/wB3) | 5.28 x 10-9 | 7.62 x 10-5 | 7.46 x 10-9 | 5.53 x 10-5 | 4.28 x 10-5 | 2.04 x 10-11, Z<3.0 |  |
| YAD020J | Inter-recombinant | wB3 x ABR x wB3 | 756 | USA4(wB3) x CH6(ABR) | 2.03 x10-42 | 5.64 x10-14 | 4.38 x10-42 | 1.25 x10-16 | 3.29 x10-17 | 3.01 x10-15 |  |
| 5122 | MYD015J(ABR) x 2J(wB3) | 4.02 x10-99 | 5.97 x10-117 | 6.59 x10-98 | 1.63 x10-44 | 3.79 x10-24 | 2.93 x10-47 | Detected |
| NID119J | Intra-recombinant | bBR x bBR x bBR x bBR x bBR | 157 | USA6(bBR) x TANX2(bBR) | 1.03 x 10-10 | 2.29 x 10-2 | 1.59 x 10-10 | 1.53 x 10-5 | 5.06 x 10-7 | 2.18 x10-10 |  |
| 878 | TANX2(bBR) x USA5(bBR) | 2.72 x 10-10 | 1.97 x 10-2 | 5.01 x 10-10 | 1.63 x 10-5 | 6.49 x 10-7 | 2.96 x10-10 |  |
| 1713 | ITA7(bBR) x KWB779J/PV0104(bBR) | 1.94 x 10-6 | 1.99 x 10-1 | 2.45 x 10-7 | 4.80 x 10-9 | 2.17 x 10-9 | 5.92 x10-18, Z<3.0 |  |
| 6621 | CP845J(bBR) x DEU4(bBR) | 6.69 x 10-37 | 4.66 x 10-17 | 4.62 x 10-36 | 1.20 x 10-21 | 1.19 x 10-17 | 2.82 x 10-18 |  |
| NID048J | Inter-recombinant | ABR x wB3 x wB2 | 242 | CH6(ABR) x FKH122J(wB3) | 1.77 x 10-26 | 9.92 x 10-25 | 1.09 x 10-26 | 8.11 x 10-6 | 4.25 x 10-6 | 2.66 x 10-7 |  |
| 643 | PV134(wB3) x Ka1J(wB3) | 1.23 x 10-14 | 1.49 x 10-10 | 1.36 x 10-15 | 7.36 x 10-3 | 3.90 x 10-9 | 5.40 x 10-9 |  |
| 6293 | GBR36(wB3) x CDN1/Q-Ca(wB2) | 2.84 x 10-22 | 2.45 x 10-14 | 1.12 x 10-22 | 1.18 x 10-8 | 7.70 x 10-11 | 8,73 x 10-15, Z>4.2 |  |
| MED302J | Inter-recombinant | ABR x wB3 x ABR x wB3 | 224 | CH6(ABR) x USA4(wB3) | 2.22 x 10-45 | 2.49 x 10-28 | 7.20 x 10-46 | 1.02 x 10-11 | 1.38 x 10-12 | 8.89 x 10-14 |  |
| 719 | USA4(wB3) x CH6(ABR) | 2.22 x 10-45 | 2.49 x 10-28 | 7.20 x 10-46 | 1.02 x 10-11 | 1.38 x 10-12 | 8.89 x 10-14 |  |
| 9175 | CHL13(ABR) x HZ6(wB3) | 8.69 x 10-13 | 2.79 x 10-8 | 7.32 x 10-14 | ND | 9.70 x 10-1 | 5.77 x 10-4 |  |
| TRD052J | Inter-recombinant | ABR x wB3 x ABR | 224 | CH6(ABR) x USA4(wB3) | 3.47 x 10-44 | 8.58 x 10-25 | 1.15 x 10-43 | 3.63 x 10-11 | 1.72 x 10-11 | 1.41 x 10-11 |  |
| 728 | USA4(wB3) x CH6(ABR) | 3.47 x 10-44 | 8.58 x 10-25 | 1.15 x 10-43 | 3.63 x 10-11 | 1.72 x 10-11 | 1.41 x 10-11 |  |
| TRD053J | Inter-recombinant | ABR x wB3 x ABR x wB3 | 236 | HRD(ABR) x FKD004J(wB3) | 2.63 x 10-36 | 3.34 x 10-10 | 4.40 x 10-36 | 2.07 x 10-11 | 1.18 x 10-10 | 1.28 x 10-9 |  |
| 775 | FKD004J(wB3) x HRD(ABR) | 2.63 x 10-36 | 3.34 x 10-10 | 4.40 x 10-36 | 2.07 x 10-11 | 1.18 x 10-10 | 1.28 x 10-9 |  |
| 9175 | CHL13(ABR) x HZ6(wB3) | 2.30 x 10-17 | 8.10 x 10-16 | 1.42 x 10-17 | 4.95 x 10-1 | ND | 1.44 x 10-4 |  |
| SMD060J | Inter-recombinant | ABR x wB3 x ABR | 190 | CH6(ABR) x USA4(wB3) | 7.06 x 10-47 | 2.78 x 10-20 | 1.93 x 10-46 | 9.25 x 10-13 | 4.05 x 10-12 | 5.33 x 10-14 |  |
| 758 | USA4(wB3) x CH6(ABR) | 7.06 x 10-47 | 2.78 x 10-20 | 1.93 x 10-46 | 9.25 x 10-13 | 4.05 x 10-12 | 5.33 x 10-14 |  |
| YMD069J | Inter-recombinant | ABR x wB3 x ABR x wB3 x ABR x wB3 | 224 | CH6(ABR) x USA4(wB3) | 4.22 x 10-38 | 3.36 x 10-38 | 6.43 x 10-11 | 3.17 x 10-12 | 3.13 x 10-12 | 5.99 x 10-14 | Detected |
| 728 | USA4(wB3) x CH6(ABR) | 4.22 x 10-38 | 3.36 x 10-38 | 6.43 x 10-11 | 3.17 x 10-12 | 3.13 x 10-12 | 5.99 x 10-14 |  |
| 4996 | SMD060J(ABR) x FKD001J(wB3) | 6.84 x 10-47 | 1.18 x 10-35 | 4.06 x 10-46 | 9.72 x 10-13 | 4.39 x 10-13 | 2.28 x 10-15 | Detected |
| 5723 | FKD001J(wB3) x SMD060J | 6.84 x 10-47 | 1.18 x 10-35 | 4.06 x 10-46 | 9.72 x 10-13 | 4.39 x 10-13 | 2.28 x 10-15 | Detected |
| 6097 | MYD015J(ABR) x 2J(wB3) | 5.99 x 10-89 | 2.40 x 10-76 | 1.36 x 10-87 | 1.58 x 10-36 | 4.79 x 10-16 | 9.85 x 10-42 | Detected |
| YMD070J | Inter-recombinant | ABR x wB3 x ABR x wB3 | 239 | CH6(ABR) x USA4(wB3) | 2.26 x 10-47 | 3.59 x 10-26 | 1.01 x 10-43 | 2.18 x 10-10 | 1.41 x 10-11 | 3.50 x 10-13 |  |
| 728 | USA4(wB3) x CH6(ABR) | 2.26 x 10-47 | 3.59 x 10-26 | 1.01 x 10-43 | 2.18 x 10-10 | 1.41 x 10-11 | 3.50 x 10-13 |  |
| 9175 | CHL13(ABR) x HZ6(wB3) | 2.31 x 10-14 | 2.20 x 10-11 | 1.14 x 10-14 | 1.42 x 10-3 | 1.96 x 10-1 | 1.52 x 10-3, Z>3.08 |  |
| SGB088J | Inter-recombinant | ABR x wB3 x ABR | 214 | CH6(ABR) x USA4(wB3) | 9.77 x 10-44 | 1.29 x 10-18 | 9.79 x10-44 | 8.64 x 10-13 | 1.07 x 10-12 | 5.26 x 10-14 |  |
| 756 | USA4(wB3) x CH6(ABR) | 9.77 x 10-44 | 1.29 x 10-18 | 9.79 x10-44 | 8.64 x 10-13 | 1.07 x 10-12 | 5.26 x 10-14 |  |
| KYD073J | Inter-recombinant | ABR x wB3 x ABR | 224 | CH6(ABR) x USA4(wB3) | 6.53 x 10-50 | 1.35 x 10-26 | 3.00 x 10-46 | 1.04 x10-10 | 1.52 x10-11 | 6.80 x 10-13, Z>6.26 |  |
| 748 | USA4(wB3) x CH6(ABR) | 6.53 x 10-50 | 1.35 x 10-26 | 3.00 x 10-46 | 1.04 x10-10 | 1.52 x10-11 | 6.80 x 10-13, Z>6.95 |  |
| GFD462J | Inter-recombinant | ABR x wB3 x ABR x wB3 x ABR x bBR | 224 | CH6(ABR) x USA4(wB3) | 1.40 x 10-42 | 1.47 x 10-26 | 1.55 x 10-42 | 5.36 x 10-11 | 2.89 x 10-12 | 1.28 x 10-13 | Detected |
| 748 | USA4(wB3) x CH6(ABR) | 1.40 x 10-42 | 1.47 x 10-26 | 1.55 x 10-42 | 5.36 x 10-11 | 2.89 x 10-12 | 1.28 x 10-13 |  |
| 5509 | SMD060J(ABR) x FKD001J(wB3) | 2.30 x 10-16 | 5.07 x 10-12 | 4.65 x 10-15 | 5.80 x 10-1 | 2.15 x 10-1 | 1.84 x 10-4 | Detected |
| 5722 | FKD001J(wB3) x SMD060J(ABR) | 2.30 x 10-16 | 5.07 x 10-12 | 4.65 x 10-15 | 5.80 x 10-1 | 2.15 x 10-1 | 1.84 x 10-4 | Detected |
| 5974 | IWD032J(ABR) x CP845J(bBR) | 6.59 x 10-186 | 1.68 x 10-172 | 4.19 x 10-191 | 4.30 x 10-49 | 6.30 x 10-31 | 9.26 x 10-64 | Detected |
| NRD350J | Intra-recombinant | wB3 x wB3 x wB2 | 738 | YAD020J(wB3) x GBR7(wB3) | 1.66 x 10-26 | 5.44 x 10-18 | 5.54 x 10-29 | 5.65 x 10-13 | 7.44 x 10-15 | 3.73 x 10-15 |  |
| 6300 | GBR36(wB3) x CDN1(wB2) | 4.53 x 10-22 | 1.91 x 10-10 | 2.22 x 10-22 | 2.96 x 10-8 | 3.37 x 10-9 | 2.44 x 10-15, Z>5.34 |  |
| KWB778J | Intra-recombinant | wB3 x wB3 x wB2 x wB2/wB3 | 738 | YAD020J(wB3) x GBR7(wB3) | 1.15 x10-31 | 1.92 x10-18 | 2.74 x10-32 | 2.30 x10-13 | 2.74 x10-13 | 6.64 x10-15 |  |
| 6293 | GBR36(wB3) x CDN1/Q-Ca(wB2) | 1.21 x 10-19 | 2.30 x 10-9 | 6.37 x 10-20 | 3.09 x 10-8 | 4.77 x 10-9 | 1.82 x 10-12, Z>4.2 |  |
| 7406-7414 | DNK2(wB2) x NLD1(wB2/wB3) | 4.80 x 10-8 | 6.08 x 10-3 | 7.81 x 10-8 | 5.02 x 10-4 | 2.46 x 10-4 | 1.54 x 10-5, Z<3.0 |  |
| KWB779J | Non-recombinant | basal-BR (bBR) |  |  |  |  |  |  |  |  |  |
| ND10J | Inter-recombinant | ABR x wB3 x ABR x wB3 x ABR x wB3 | 190 | CH6(ABR) x USA4(wB3) | 2.05 x10-35 | 5.89 x10-16 | 1.69 x10-37 | 6.56 x10-12 | 2.43 x10-13 | 7.11 x10-15 |  |
| 756 | USA4(wB3) x CH6(ABR) | 2.05 x10-35 | 5.89 x10-16 | 1.69 x10-37 | 6.56 x10-12 | 2.43 x10-13 | 7.11 x10-15 |  |
| 4632 | SMD060J(ABR) x DMJ(wB3) | 1.21 x10-82 | 3.76 x10-61 | 5.04 x10-82 | 8.98 x10-22 | 8.13 x10-24 | 1.01 x10-25 | Detected |
| 5990 | DMJ(wB3) x SMD060J(ABR) | 1.21 x10-82 | 3.76 x10-61 | 5.04 x10-82 | 8.98 x10-22 | 8.13 x10-24 | 1.01 x10-25 | Detected |
| KGD54J | Inter-recombinant | ABR x wB3 x ABR x wB3 x ABR x wB3 | 184 | CH6(ABR) x USA4(wB3) | 1.85 x10-49 | 1.63 x10-24 | 4.18 x10-43 | 8.56 x10-14 | 3.21 x10-14 | 1.92 x10-15 |  |
| 758 | USA4(wB3) x CH6(ABR) | 1.85 x10-49 | 1.63 x10-24 | 4.18 x10-43 | 8.56 x10-14 | 3.21 x10-14 | 1.92 x10-15 |  |
| 4632 | SMD060J(ABR) x DMJ(wB3) | 3.15 x10-86 | 6.45 x10-64 | 1.66 x10-86 | 8.66 x10-24 | 6.30 x10-25 | 4.40 x10-27 | Detected |
| 6001 | DMJ(wB3) x SMD060J(ABR) | 3.15 x10-86 | 6.45 x10-64 | 1.66 x10-86 | 8.66 x10-24 | 6.30 x10-25 | 4.40 x10-27 | Detected |
| CHZJ26A | Intra-recombinant | wB3 x wB3 x wB2 | 748 | YAD020J(wB3) x GBR7(wB3) | 2.08 x10-30 | 4.90 x10-16 | 6.20 x10-30 | 1.19 x10-14 | 4.04 x10-15 | 4.55 x10-14 |  |
| 6293 | GBR36(wB3) x CDN1/Q-Ca(wB2) | 9.23 x 10-27 | 4.36 x 10-18 | 3.06 x 10-27 | 3.16 x 10-12 | 3.94 x 10-12 | 6.41 x 10-16, Z>4.2 |  |
| CHL13 | Inter-recombinant | ABR x wB3 x ABR x bBR x ABR | 250 | HRD(ABR) x PV376Br (wB3) | 1.20 x10-31 | 3.17 x10-12 | 4.44 x10-31 | 2.49 x10-15 | 2.38 x10-15 | 2.48 x10-19, Z>4.51 | Detected |
| 728 | USA4(wB3) x CH6(ABR) | 5.94 x10-38 | 5.51 x10-16 | 1.53 x10-38 | 8.90 x10-11 | 4.54 x10-11 | 2.52 x10-12 |  |
| 5672 | TRD052J(ABR) x TANX2(bBR) | 4.92 x10-35 | 1.45 x10-33 | 3.48 x10-35 | 3.80 x10-7 | 3.13 x10-7 | 9.41 x10-11, Z>6.9 |  |
| 5950 | TANX2 (bBR) x TRD052J(ABR) |  |  |  |  |  | Z>6.9 | Detected |
| CH6 | Non-recombinant | Asian-BR (ABR) |  |  |  |  |  |  |  |  |  |
| CHK16 | Inter- recombinant | wB3 x ABR x wB3 | 745 | FKD004J(wB2-wB3) x HRD(ABR) | 5.81 x10-38 | 3.8 x10-8 | 2.90 x10-37 | 2.94 x10-14 | 2.25 x10-13 | 7.02 x10-11, Z>6.76 |  |
| 9123 | CHL13(ABR) x HZ6(wB3) | 2.01 x10-20 | 7.43 x10-13 | 1.60 x10-18 | 1.90 x 10-2 | 8.95 x 10-1 | 9.22 x10-5, Z>3.77 |  |
| HZ6 | Intra-recombinant | wB3 x wB3 x wB2 | 672 | YAD020J(wB3) x GBR7(wB3) | 9.38 x10-36 | 1.73 x10-23 | 3.37 x10-36 | 1.66 x10-13 | 7.22 x10-16 | 3.68 x10-16 |  |
| 6293 | GBR36(wB3) x CDN1/Q-Ca(wB2) | 1.31 x 10-18 | 1.30 x 10-7 | 1.45 x 10-18 | 1.22 x 10-8 | 7.56 x 10-9 | 1.03 x 10-12, Z>4.2 |  |
| USA 1 | Intra-recombinant | wB3 x wB2 | 6300 | GBR36(wB3) x CDN1(wB2) | 1.25 x 10-16 | 1.14 x 10-5 | 4.29 x 10-17 | 2.79 x 10-10 | 1.33 x 10-7 | 1.69 x 10-14, Z>4.55 |  |
| CAR37 | Intra-recombinant | wB3 x wB2 x wB2/wB3 x wB2 | 243 | Ka1J(wB3) x DNK3(wB2) | 1.96 x 10-23 | 3.37 x 10-13 | 1.43 x 10-23 | 4.49 x 10-7 | 7.36 x 10-8 | 1.03x 10-12 |  |
| 1037 | Ka1J(wB3) x PV134(wB3) | 1.10 x 10-19 | 5.52 x 10-7 | 5.81 x 10-20 | 1.68 x 10-9 | 3.32 x 10-11 | 2.64 x 10-15 |  |
| 6350 | GBR36(wB3) x CDN1(wB2) | 3.00 x 10-19 | 4.34 x 10-9 | 4.39 x 10-19 | 3.56 x 10-8 | 2.69 x 10-6 | 1.08 x 10-13, Z>6.08 |  |
| CAR37A | Non-recombinant | world-B1 (wB1) |  |  |  |  |  |  |  |  |  |
| CAR39 | Intra-recombinant | wB2 x wB2 | 2641 | CAR37A(wB2) x DNK3(wB2) | 8.72 x 10-155 | 8.88 x 10-149 | 1.10 x 10-155 | 7.61 x 10-45 | 1.53 x 10-31 | 8.71 x 10-54, Z>8.92 |  |
| TUR1 | Intra-recombinant | wB2 x wB3 x wB2 | 2505 | FRA2(wB2) x KEN1(wB3) | 1.15 x 10-57 | 1.33 x 10-56 | 5.23 x 10-56 | 1.68 x 10-31 | 3.73 x 10-18 | 1.79 x 10-47, Z>6.33 | Detected |
| 5899 | GRC17(wB3) x PV376Br(wB2) | 9.62 x 10-62 | 3.25 x 10-55 | 1.91 x 10-58 | 6.95 x 10-33 | 2.47 x 10-21 | 2.07 x 10-48, Z>5.42 |  |
| TUR9 | Non-recombinant | Asian-BR (ABR) |  |  |  |  |  |  |  |  |  |
| IRNTRa6 | Non-recombinant | basal-B2 (bB2) |  |  |  |  |  |  |  |  |  |
| IRNSS5 | Non-recombinant | basal-B2 (bB2) |  |  |  |  |  |  |  |  |  |
| WFLB06 | Inter- recombinant | ABR x bBR x ABR x bBR x ABR | 475 | NID048J(ABR) x CP845J(bBR) | 1.19 x 10-36 | 6.76 x 10-13 | 2.57 x 10-36 | 3.94 x 10-10 | 6.49 x 10-9 | 3.47 x 10-6 |  |
| 4132 | CP845J(bBR) x AKD934J(ABR) | 2.20 x 10-52 | 2.37 x 10-46 | 1.70 x 10-52 | 4.04 x 10-12 | 9.23 x 10-12 | 3.36 x 10-15 | Detected |
| 4502 | HRD(ABR) x CP845J(bBR) | 3.33 x 10-50 | 9.45 x 10-45 | 2.34 x 10-50 | 8.55 x 10-13 | 5.97 x 10-12 | 2.98 x 10-14 | Detected |
| 7809 | CP845J(bBR) x HRD(ABR) | 2.09 x 10-73 | 8.70 x 10-63 | 3.68 x 10-73 | 2.75 x 10-23 | 3.77 x 10-24 | 1.49 x 10-26 |  |
| TANX2 | Intra-recombinant | bBR x bBR x bBR | 1107 | ITA7(bBR) x KWB779J(bBR) | 7.05 x 10-38 | 9.78 x 10-41 | 1.01 x 10-42 | 9.21 x 10-31 | 9.95 x 10-13 | 1.87 x 10-56 |  |
| 5968 | KWB779J(bBR) x ITA7(bBR) | 3.41 x 10-38 | 4.79 x 10-41 | 4.90 x 10-43 | 7.56 x 10-31 | 4.81 x 10-13 | 9.06 x 10-57 |  |
| GBR 98 | Intra-recombinant | wB3 x wB3 x wB2 | 731 | YAD020J(wB3) x GBR7(wB3) | 4.13 x 10-37 | 6.63 x 10-22 | 1.11 x 10-36 | 7.78 x 10-15 | 3.51 x 10-15 | 1.28 x 10-15 |  |
| 6767 | GBR51(wB3) x GBR27(wB3) | 1.66 x 10-13 | ND | 1.00 x 10-13 | 3.66 x 10-5 | 2.38 x 10-5 | 1.91 x 10-4, Z>3.72 | Detected |
| AllA | Inter- recombinant | wB3 x bB1 | 485 | TUR1(wB3) x TIGA(bB1) | 3.12 x 10-16 | 1.47 x 10-6 | 1.01 x 10-15 | 4.22 x 10-1 | 8.38 x10-4 | 1.30 x 10-13, Z>5.17 | Detected |
| ASP | Non-recombinant | basal-B0 (bB0) |  |  |  |  |  |  |  |  |  |
| BEL 1 | Non-recombinant | world-B0 (wB0) |  |  |  |  |  |  |  |  |  |
| DEU 1 | Non-recombinant | world-B2 (wB2) |  |  |  |  |  |  |  |  |  |
| DEU 2 | Non-recombinant | world-B2 (wB2) |  |  |  |  |  |  |  |  |  |
| DEU 4 | Intra-recombinant | bBR x bBR |  | KWB779J(bBR) x ITA7(bBR) | 2.39 x 10-18 | 1.13 x 10-16 | 2.13 x 10-17 | 1.20 x 10-22 | 4.26 x 10-19 | 4.22 x 10-6, Z>5.4 |  |
| DEU 5 | Intra-recombinant | wB2 x wB2 | 7675 | DNK3(wB2) x CDN1(wB2) | 3.75 x10-14 | 2.81 x10-2 | 3.52 x10-13 | 2.21 x10-7 | 6.47 x10-8 | 9.62 x10-11 |  |
| DEU 7 | Inter- recombinant | wB3 x bB1 | 612 | TUR1(wB3) x TIGA(bB1) | 3.84 x 10-21 | 7.06 x 10-12 | 3.53 x 10-19 | 6.55 x 10-6 | 4.63 x 10-8 | 2.09 x 10-17, Z>7.04 | Detected |
| DNK 3 | Non-recombinant | world-B2 (wB2) |  |  |  |  |  |  |  |  |  |
| DNK 4 | Intra-recombinant | wB3 x wB3 x wB2 | 744 | YAD020J(wB3) x GBR7(wB3) | 1.17 x 10-46 | 3.86 x 10-41 | 5.56 x 10-47 | 3.39 x 10-15 | 1.38 x 10-16 | 5.62 x 10-21 |  |
| 6300 | GBR36(wB3) x CDN1(wB2) | 1.12 x 10-24 | 2.60 x 10-12 | 1.42 x 10-24 | 4.63 x 10-10 | 4.61 x 10-11 | 2.60 x 10-15, Z>5.47 |  |
| Eru1D | Intra-recombinant | bB1 x bB1 | 5533 | A64(bB1) x Al(bB1) | 2.74 x 10-9 | 1.11 x 10-2 | 1.06 x 10-13 | 4.23 x 10-10 | 4.26 x 10-12 | 2.29 x 10-12, Z>4.84 |  |
| ESP 1 | Inter- recombinant | wB1 x bB1 | 698 | PRT1(wB1) x A64(bB1) | 3.89 x 10-37 | 1.24 x 10-41 | 8.28 x 10-40 | 2.18 x 10-11 | 3.13 x 10-10 | 8.33 x 10-23 |  |
| ESP 2 | Inter- recombinant | wB1 x bB1 | 686 | PRT1(wB1) x A64(bB1) | 3.77 x 10-30 | 1.03 x 10-36 | 1.44 x 10-32 | 1.30 x 10-9 | 7.70 x 10-10 | 4.40 x 10-24, Z>6.1 |  |
| FRA 2 | Non-recombinant | world-B2 (wB2) |  |  |  |  |  |  |  |  |  |
| GBR 7 | Intra-recombinant | wB3 x wB2 | 6300 | GBR36(wB3) x CDN1(wB2) | 1.45 x 10-21 | 6.92 x 10-10 | 4.72 x 10-22 | 9.66 x 10-10 | 1.46 x 10-10 | 2.44 x 10-15, Z>5.3 |  |
| GBR 8 | Intra-recombinant | wB2 x wB3 | 6628 | POL2(wB2) x KEN1(wB3) | 2.95 x 10-74 | 2.98 x10-49 | 4.67 x 10-74 | 1.91 x 10-22 | 6.88 x 10-23 | 1.44 x 10-23 |  |
| GBR 27 | Intra-recombinant | wB3 x wB3 x wB | 738 | YAD020J(wB3) x GBR7(wB3) | 1.50 x 10-37 | 1.32 x10-24 | 6.69 x 10-38 | 4.67 x 10-16 | 1.06 x 10-16 | 1.10 x 10-15 |  |
| 6200 | GBR36(wB3) x CDN1(wB2) | 1.02 x 10-23 | 7.32 x 10-14 | 4.89 x 10-24 | 1.30 x 10-11 | 2.05 x 10-11 | 1.58 x 10-15, Z>5.99 |  |
| GBR 30 | Intra-recombinant | wB3 x wB3 x wB2 | 738 | YAD020J(wB3) x GBR7(wB3) | 6.85 x 10-41 | 3.87 x 10-30 | 6.91 x 10-41 | 9.63 x 10-15 | 2.56 x 10-16 | 6.21 x 10-16 |  |
| 6300 | GBR36(wB3) x CDN1(wB2) | 4.14 x 10-22 | ND | 2.42 x 10-22 | 1.09 x 10-9 | 9.64 x 10-11 | 4.47 x 10-13, Z>6.01 |  |
| GBR 31 | Intra-recombinant | wB3 x wB3 x wB2 | 748 | YAD020J(wB3) x GBR7(wB3) | 4.04 x 10-40 | 2.85 x 10-28 | 1.32 x 10-40 | 2.18 x 10-15 | 2.92 x 10-16 | 1.16 x 10-16 |  |
| 6350 | GBR36(wB3) x CDN1(wB2) | 5.30 x 10-23 | 1.67 x 10-14 | 3.01 x 10-23 | 3.68 x 10-8 | 1.02 x 10-8 | 8.38 x 10-13, Z>6.08 |  |
| GBR 32 | Intra-recombinant | wB3 x wB3 x wB2 | 738 | YAD020J(wB3) x GBR7(wB3) | 6.85 x 10-41 | 3.87 x 10-30 | 6.91 x 10-41 | 9.63 x 10-15 | 2.56 x 10-16 | 6.21 x 10-19 |  |
| 6300 | GBR36(wB3) x CDN1(wB2) | 1.40 x 10-22 | 8.94 x 10-14 | 8.00 x 10-23 | 1.08 x 10-9 | 9.64 x 10-11 | 4.47 x 10-13, Z>6.01 |  |
| GBR 38 | Intra-recombinant | wB3 x wB3 x wB2 | 702 | YAD020J(wB3) x GBR7(wB3) | 5.35 x 10-37 | 2.62 x 10-19 | 1.59 x 10-36 | 1.21 x 10-13 | 9.08 x 10-15 | 5.00 x 10-15 |  |
| 6800 | GBR36(wB3) x CDN1(wB2) |  |  |  |  |  | Z>4.66 | Detected |
| GBR 51 | Intra-recombinant | wB3 x wB3 | 682 | YAD020J(wB3) x GBR7(wB3) | 2.47 x 10-38 | 1.55 x 10-18 | 2.99 x 10-38 | 4.95 x 10-14 | 1.75 x 10-14 | 2.87 x 10-14 |  |
| GBR 57 | Intra-recombinant | wB0 x wB3 | 8817 | GBR83(wB0) x NLD2(wB3) | 7.79 x 10-33 | 7.01 x 10-29 | 5.23 x 10-34 | 2.41 x 10-8 | 8.41 x 10-5 | 1.16 x 10-13 |  |
| GBR 83 | Non-recombinant | world-B0 (wB0) |  |  |  |  |  |  |  |  |  |
| GBR 91 | Intra-recombinant | wB3 x wB3 x wB2 | 748 | YAD020J(wB3) x GBR7(wB3) | 3.01 x 10-40 | 1.70 x 10-28 | 4.16 x 10-41 | 1.59 x 10-14 | 5.40 x 10-16 | 2.55 x 10-16 |  |
| 6300 | GBR36(wB3) x CDN1(wB2) | 1.16 x 10-21 | 2.26 x 10-14 | 6.20 x 10-22 | 3.03 x 10-10 | 4.11 x 10-11 | 1.69 x 10-14, Z>5.99 |  |
| GK1 | Non-recombinant | basal-B2 (bB2) |  |  |  |  |  |  |  |  |  |
| HUN 1 | Non-recombinant | world-B2 (wB2) |  |  |  |  |  |  |  |  |  |
| ITA1 A | Non-recombinant | basal-B1 (bB1) |  |  |  |  |  |  |  |  |  |
| ITA 2 | Non-recombinant | basal-B1 (bB1) |  |  |  |  |  |  |  |  |  |
| ITA 4 | Inter- recombinant | bBR x bB2 | 657 | ITA8(bBR) x IS1(bB2) | 4.91 x 10-25 | 4.15 x 10-21 | 4.06 x 10-24 | 2.95 x 10-6 | 5.36 x 10-6 | 2.57 x 10-17 |  |
| ITA 5 | Inter-recombinant | bBR x bB2 | 644 | ITA8(bBR) x IS1(bB2) | 2.46 x 10-23 | 1.09 x 10-14 | 1.29 x 10-22 | 5.25 x 10-6 | 3.78 x 10-7 | 5.88 x 10-16 |  |
| ITA 6 | Inter- recombinant | bBR x bB2 | 654 | ITA8(bBR) x IS1(bB2) | 2.76 x 10-26 | 6.94 x 10-22 | 5.32 x 10-26 | 1.57 x 10-6 | 5.37 x 10-7 | 3.18 x 10-18 |  |
| ITA 8 | Non-recombinant |  |  |  |  |  |  |  |  |  |  |
| ITA 9A | Intra-recombinant | bB1 x bB1 | 1106 | ITA1A(bB1) x A64(bB1) | 1.53 x10-63 | 3.55 x10-62 | 6.85 x10-62 | 1.54 x10-24 | 4.40 x10-16 | 1.49 x10-36, Z>6.22 |  |
| 2468 | GRC42(bB1) x A64(bB1) | 2.51 x 10-8 | 1.48 x 10-7 | 5.42 x 10-10 | 1.41 x 10-10 | 1.64 x 10-5 | 5.47 x 10-32 |  |
| NLD 2 | Intra-recombinant | wB3 x wB3 x wB2 | 738 | YAD020J(wB3) x GBR7(wB3) | 5.12 x10-33 | 7.49 x10-20 | 3.40 x10-33 | 2.86 x10-14 | 1.75 x10-14 | 1.66 x10-14 |  |
| 6300 | GBR36(wB3) x CDN1(wB2) | 4.42 x 10-22 | 1.16 x 10-9 | 2.29 x 10-22 | 4.59 x 10-9 | 8.16 x 10-10 | 3.23 x 10-14, Z>5.4 |  |
| OM-N | Non-recombinant | Orchis |  |  |  |  |  |  |  |  |  |
| OM-A | Non-recombinant | Orchis |  |  |  |  |  |  |  |  |  |
| ORM | Non-recombinant | Orchis |  |  |  |  |  |  |  |  |  |
| OS | Non-recombinant | Orchis |  |  |  |  |  |  |  |  |  |
| POL 1 | Non-recombinant | world-B2 (wB2) |  |  |  |  |  |  |  |  |  |
| PRT 1 | Non-recombinant | world-B0 (wB2) |  |  |  |  |  |  |  |  |  |
| PV0054 | Intra-recombinant | wB2 x wB2/wB3(?) x wB2 | 711 | DNK3(wB2) x NLD1(wB2/wB3) | 4.51 x 10-16 | 4.78 x 10-6 | 1.02 x 10-16 | 4.40 x 10-5 | 5.40 x 10-7 | 1.18 x 10-6, Z>5.5 |  |
| 6550 | GBR36(wB3) x CDN1(wB2) | 2.58 x 10-10 | 4.85 x 10-7 | 1.23 x 10-10 | 5.59 x 10-5 | 1.35 x 10-4 | 6.48 x 10-11, Z>5.17 |  |
| POL 2 | Non-recombinant | world-B2 (wB2) |  |  |  |  |  |  |  |  |  |
| POL 4 | Intra-recombinant | wB2 x wB2 | 6484 | NZ290(wB2) x DEU1(wB2) | 2.02 x 10-29 | 4.78 x 10-26 | 1.28 x 10-28 | 6.02 x 10-18 | 5.23 x 10-13 | 2.75 x 10-20 |  |
| PV177 | Intra-recombinant | wB3 x wB3 x wB2 | 730 | YAD020J(wB3) x GBR7(wB3) | 2.88 x 10-32 | 1.62 x 10-16 | 2.28 x 10-32 | 5.99 x 10-14 | 5.04 x 10-14 | 9.50 x 10-14 |  |
| 6300 | GBR36(wB3) x CDN1(wB2) | 7.87 x 10-24 | 2.90 x 10-9 | 4.22 x 10-24 | 6.60 x 10-10 | 3.61 x 10-11 | 9.44 x 10-16, Z>5.61 |  |
| TIGA | Non-recombinant | basal-B1 (bB1) |  |  |  |  |  |  |  |  |  |
| TIGD | Non-recombinant | basal-B1 (bB1) |  |  |  |  |  |  |  |  |  |
| UT | Intra-recombinant | wB2 x wB2/wB3 | 7694 | DNK3(wB2) x GBR7(wB2) | 2.58 x10-17 | 2.12 x10-3 | 4.15 x10-17 | 7.66 x10-8 | 2.43 x10-9 | 4.36 x10-10 |  |
| PV134 | Inter- recombinant | wB3 x bB1/bB2 x wB3 x wB2 | 1019 | KEN1(wB3) x AllA(bB1) | 9.93 x 10-47 | 2.51 x 10-2 | 5.19 x 10-42 | 5.37 x 10-24 | 6.92 x 10-18 | 1.32 x 10-24, Z>6.11 |  |
| 3340 | AllA(bB1) x GBR27(wB3) | 5.53 x 10-48 | 5.37 x 10-1 | 2.16 x 10-43 | 3.79 x 10-23 | 4.41 x 10-18 | 1.13 x 10-19, Z>6.11 | Detected |
| 6144 | GBR51(wB3) x DNK3(wB2) | 6.97 x 10-10 | ND | 1.09 x 10-9 | 3.44 x 10-6 | 4.18 x 10-1 | 8.04 x 10-7, Z>6.17 |  |
| PV389 | Intra-recombinant | wB3 x wB3 x wB2 | 730 | YAD020J(wB3) x GBR7(wB3) | 1.60 x 10-32 | 6.09 x 10-18 | 1.28 x 10-32 | 1.01 x 10-13 | 9.28 x 10-14 | 8.64 x 10-14 |  |
| 6300 | GBR36(wB3) x CDN1(wB2) | 3.83 x 10-23 | 3.50 x 10-9 | 2.05 x 10-23 | 2.43 x 10-9 | 2.94 x 10-10 | 1.88 x 10-15, Z>5.61 |  |
| USA 4 | Intra-recombinant | wB3 x wB2 | 1745 | GBR91(wB3) x HUN1(wB2) | 2.63 x 10-46 | 1.31 x 10-10 | 1.70 x 10-47 | 1.16 x 10-19 | 5.83 x 10-19 | 4.58 x 10-20 |  |
| USA 5 | Intra-recombinant | bBR x bBR x bBR | 3973 | CP845J(bBR) x Cal1(bBR) | 7.75 x 10-14 | 1.20 x 10-3 | 9.12 x 10-13 | 2.42 x 10-12 | 7.30 x 10-14 | 2.18 x 10-17, Z>4.46 |  |
| 5767 | Cal1(bBR) x CP845J(bBR) | 7.75 x 10-14 | 1.20 x 10-3 | 9.12 x 10-13 | 2.42 x 10-12 | 7.30 x 10-14 | 2.18 x 10-17, Z>4.46 |  |
| USA 6 | Intra-recombinant | bBR x bBR x bBR | 3973 | CP845J(bBR) x Cal1(bBR) | 8.81 x 10-15 | 7.77 x 10-6 | 3.67 x 10-14 | 2.97 x 10-13 | 8.97 x 10-10 | 7.15 x 10-19, Z>4.46 |  |
| 5774 | Cal1(bBR) x CP845J(bBR) | 8.81 x 10-15 | 7.77 x 10-6 | 3.67 x 10-14 | 2.97 x 10-13 | 8.97 x 10-10 | 7.15 x 10-19, Z>4.46 |  |

Major groups: bB; basal-B, bBR; basal-BR, wB; world-B, ABR; Asian-BR. Number followed by major groups indicates the subgroup (sublineage) in the major groups [2].
